# Supplementary material for: Thermostability improvement of a Talaromyces leycettanus xylanase by rational protein engineering
Source: PubMed Central journal article supplement (PMC5681632; doi:10.1038/s41598-017-12659-y), 2017-11-10
Supplement: 41598_2017_12659_MOESM1_ESM.pdf [file 41598_2017_12659_MOESM1_ESM.pdf]

1 **Supplementary materials to**  
2 **Thermostability improvement of a *Talaromyces leycettanus* xylanase by**  
3 **semi-rational protein engineering**

4 Xiaoyu Wang<sup>a,b</sup> · Rui Ma<sup>a</sup> · Xiangming Xie<sup>a</sup> · Weina Liu<sup>a</sup> · Tao Tu<sup>a</sup> · Fei  
5 Zheng<sup>a,b</sup> · Shuai You<sup>a</sup> · Jianzhong Ge<sup>a</sup> · Huifang Xie<sup>a</sup> · Bin Yao<sup>a,\*</sup> · Huiying Luo<sup>a,\*</sup>

6

7 Key Laboratory for Feed Biotechnology of the Ministry of Agriculture, Feed  
8 Research Institute, Chinese Academy of Agricultural Sciences, Beijing 100081,  
9 People's Republic of China <sup>a</sup>; College of Biological Sciences and Biotechnology,  
10 Beijing Forestry University, Beijing 100083, People's Republic of China <sup>b</sup>

11

12 Corresponding authors. E-mail: binyao@caas.cn; luohuiying@caas.cn.

13

14

15

16

17

18

19 **Supplementary Table 1 Summary of the recombinant *TIXyn11B* purification**

| Purification step | Protein concentration (µg/mL) | Total activity (U) | Specific activity (U/mg) | Recovery rate (%) |
|-------------------|-------------------------------|--------------------|--------------------------|-------------------|
| Crude enzyme      | 86                            | 340,600            | 6,600                    | -                 |
| Vivaflow          | 532                           | 180,900            | 6,800                    | 53                |
| Anion exchange    | 384                           | 164,300            | 8,600                    | 48                |

20

21

22 **Supplementary Table 2 Primers used in this study**

| Primers               | Sequences (5'→3') <sup>a</sup>           |
|-----------------------|------------------------------------------|
| <i>TLXyn11BF</i>      | ATGGTGTCTCCTTCTCCTCCCTCGC                |
| <i>TLXyn11BR</i>      | CTAGGAAACAGTAATGGAAGAGGACCCG             |
| <i>TLXyn11B_EcoF</i>  | ACGAATTCGCTCCTAGCGAGCTCTCCAAACGC         |
| <i>TLXyn11B_NotR</i>  | ATTTGCGGCCGCCTAGGAAACAGTAATGGAAGAGGACCCG |
| <i>TLXyn11B_T1-F</i>  | ACGAATTCGCGCCAAACACTAACCTCAAGCTCC        |
| <i>TLXyn11B_T2-F</i>  | ACGAATTCACACTAACCTCAAGCTCCACTGGC         |
| <i>TLXyn11B_S3-F</i>  | ACGAATTCGCTCCTNNKGAGCTCTCCAAACGC         |
| <i>TLXyn11B_D35-F</i> | GGAACGGTCNNKTACACTAATGGCAA               |
| <i>TLXyn11B_D35-R</i> | ATTGCCATTAGTGTAMNNGACCGTTCC              |
| 5sAOX                 | TTGCGACTGGTTCCAATTGACAAGCTTTTG           |
| 3sAOX                 | TCCTCTTGATTAGAATCTAGCAAGACCGGTCTTC       |

23 <sup>a</sup> The restriction sites are underlined

24

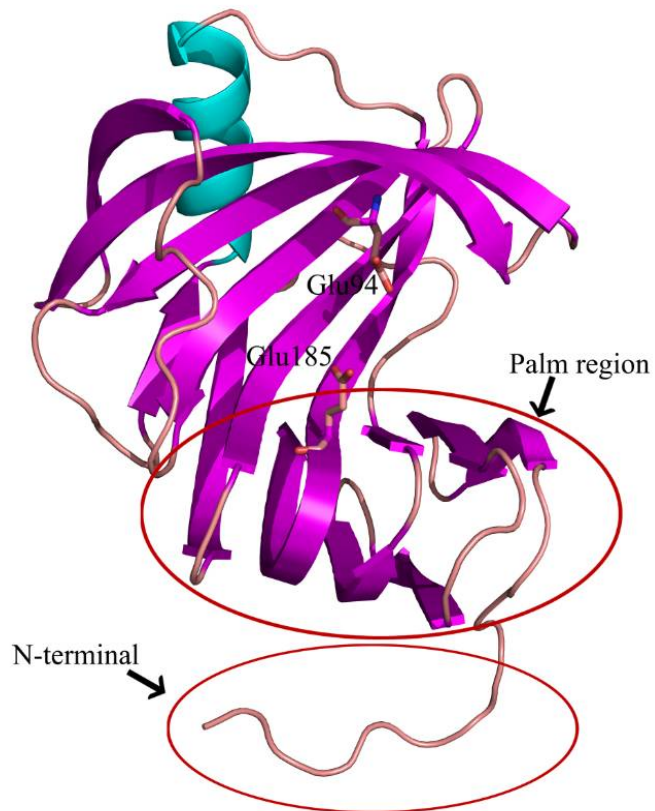

25

26 **Supplementary Fig. 1** Homology modeling of *TlXyn11B* with the GH11  
27 endo-1,4-β-xylanase from *T. cellulolyticus* (PDB: 3WP3) as template. The catalytic  
28 residues, palm region and N-terminus are indicated.

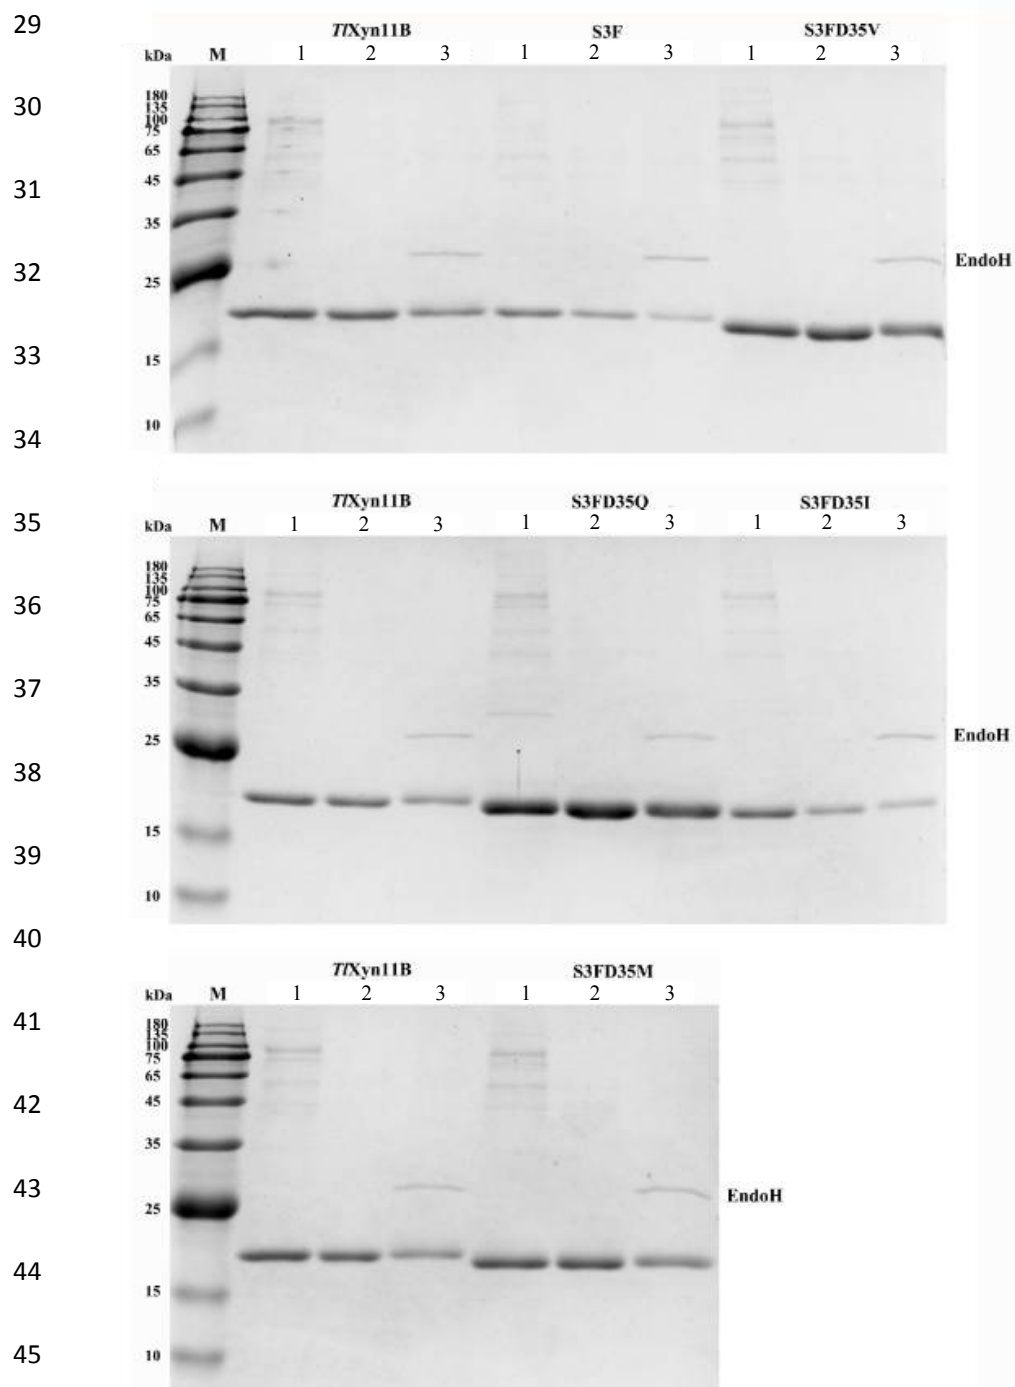

46 **Supplementary Fig. 2** SDS-PAGE analysis of *TTXyn11B* and its mutants. Lanes: M,  
47 the molecular mass standards; 1, the crude enzymes; 2, the purified recombinant  
48 enzymes; 3, the deglycosylated enzymes with Endo H treatment.

49

50

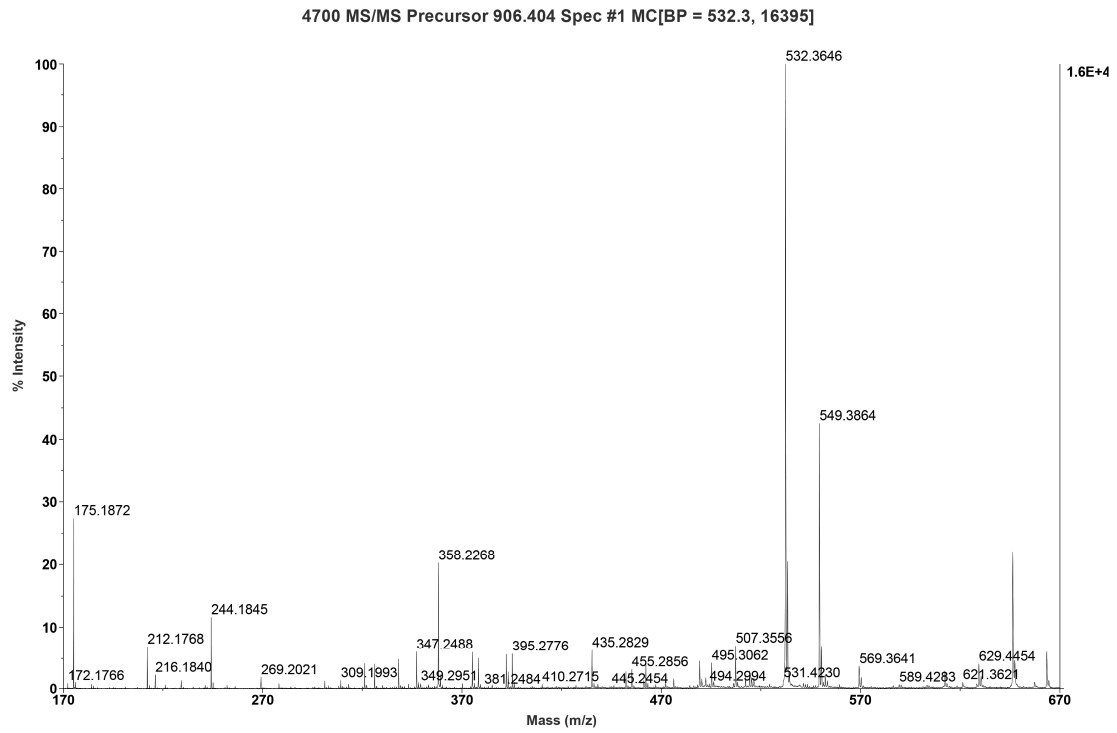

51

52 **Supplementary Fig. 3** MS identification of the purified recombinant *TlXyn11B*.
